# Supplementary material for: Alpelisib Efficacy in Hormone Receptor-Positive HER2-Negative PIK3CA-Mutant Advanced Breast Cancer Post-Everolimus Treatment
Source: MDPI journal article supplement (doi:10.3390/genes13101763), 2022-09-29
Supplement: s1 [file s1]

Table S1A- treatment lines for the individual patients

| Patient # | 1st line                | 2nd line                    | 3rd line                             | 4th line                     | 5th line                    |
|-----------|-------------------------|-----------------------------|--------------------------------------|------------------------------|-----------------------------|
| 1         | Palbociclib+Letrozole   | <b>Afinitor+Fulvestrant</b> | Bevacizumab+Capecitabine             |                              | NA                          |
| 2         | Palbociclib+Letrozole   | Fulvestrant                 | <b>Afinitor+Exemestane</b>           | <b>Alpelisib+Fulvestrant</b> | NA                          |
| 3         | Palbociclib+Fulvestrant | <b>Afinitor+Exemestane</b>  | <b>Alpelisib+Exemestane</b>          | NA                           | NA                          |
| 4         | Palbociclib+Letrozole   | Elacestrant                 | <b>Afinitor+Exemestane</b>           | <b>Alpelisib+Fulvestrant</b> | Paclitaxel+Carboplatin      |
| 5         | Letrozole               | Palbociclib+Fulvestrant     | <b>Afinitor+Exemestane</b>           | <b>Alpelisib+Fulvestrant</b> | Navelbine PO                |
| 6         | Tamoxifen               | Palbociclib+Letrozole       | abemaciclib+atezolizumab+Fulvestrant | <b>Afinitor+Exemestane</b>   | <b>Alpelisib+Exemestane</b> |
| 7         | Palbociclib+Letrozole   | Palbociclib+Fulvestrant     | Capecitabine                         | <b>Afinitor+Exemestane</b>   | Vinorelbine                 |
| 8         | Palbociclib+Letrozole   | Fulvestrant                 | <b>Afinitor+Exemestane</b>           | <b>Alpelisib+Fulvestrant</b> | NA                          |
| 9         | Palbociclib+Fulvestrant | <b>Afinitor+Letrozole</b>   | <b>Alpelisib+Fulvestrant</b>         | Paclitaxel                   | NA                          |
| 10        | Palbociclib+Letrozole   | Fulvestrant                 | <b>Afinitor+Exemestane</b>           | Capecitabine                 | Doxil                       |
| 11        | Palbociclib+Fulvestrant | <b>Afinitor+Exemestane</b>  | <b>Alpelisib+Exemestane</b>          | NA                           | NA                          |
| 12        | Palbociclib+Fulvestrant | <b>Afinitor+Exemestane</b>  | Paclitaxel                           | Capecitabine                 | Vinorelbine                 |
| 13        | Avastin+Paclitaxel      | <b>Afinitor+Exemestane</b>  | Capecitabine                         | Palbociclib+Fulvestrant      | Doxil                       |

| Patient # | 6th line                | 7th line                     | 8th line                     |
|-----------|-------------------------|------------------------------|------------------------------|
| 1         | NA                      | NA                           | NA                           |
| 2         | NA                      | NA                           | NA                           |
| 3         | NA                      | NA                           | NA                           |
| 4         | Capecitabine            | NA                           | NA                           |
| 5         | NA                      | NA                           | NA                           |
| 6         | Capecitabine            | NA                           | NA                           |
| 7         | Carboplatin+Gemcitabine | <b>Alpelisib+Fulvestrant</b> | Phase1                       |
| 8         | NA                      | NA                           | NA                           |
| 9         | NA                      | NA                           | NA                           |
| 10        | Paclitaxel              | <b>Alpelisib+Fulvestrant</b> | NA                           |
| 11        | NA                      | NA                           | NA                           |
| 12        | Carboplatin+Gemcitabine | Adriamycin                   | <b>Alpelisib+Fulvestrant</b> |
| 13        | Vinorelbine             | <b>Alpelisib+Fulvestrant</b> | Eribulin                     |

Table S1B- Detailed NGS test

| Patient # | Test                                                             |
|-----------|------------------------------------------------------------------|
| 1         | N/A                                                              |
| 2         | CeGat                                                            |
| 3         | CE-IVD 22genes                                                   |
| 4         | Guardant360                                                      |
| 5         | N/A                                                              |
| 6         | FoundationCDx                                                    |
| 7         | FoundationCDx                                                    |
| 8         | BGI                                                              |
| 9         | Oncomine                                                         |
| 10        | FoundationCDx                                                    |
| 11        | FoundationCDx                                                    |
| 12        | VariantPlex Comprehensive Thyroid and Lung (CTL) panel (Invitae) |
| 13        | Oncomine                                                         |

N/A – Not available.
